# Supplementary material
Source: bioRxiv or medRxiv preprint supplement (https://www.biorxiv.org/highwire/filestream/10023/field_highwire_adjunct_files/3/037218-4.pdf)

# S4 Figure

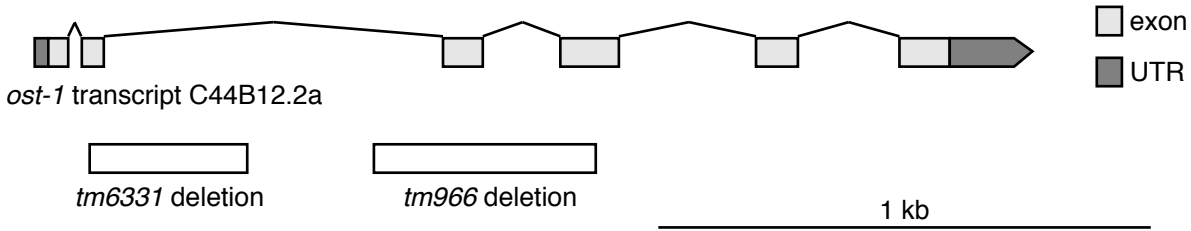

Expected if *ost-1(LOF)* is recessive lethal:

Phenotype of progeny  
from *ost-1(LOF)/+*

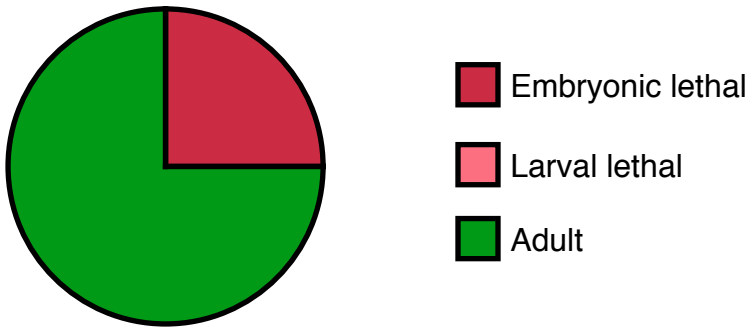

Observed:

Phenotype of progeny  
from *ost-1(tm6331)/+*

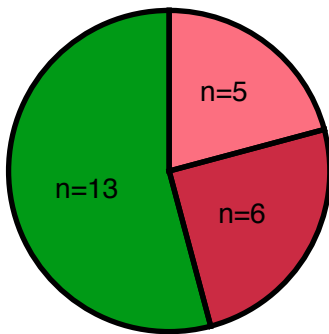

Phenotype of progeny  
from *ost-1(tm966)/+*

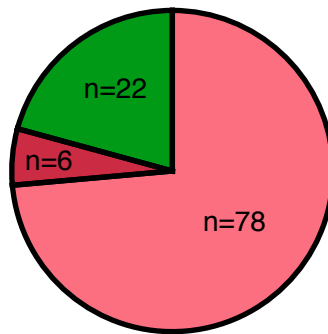

Supplement: Supplementary file [file 037218-4.pdf]
